# Supplementary material
Source: PubMed Central journal article supplement (PMC3045263)
Supplement: NIHMS219112-supplement-1_si_001.pdf [file NIHMS219112-supplement-1_si_001.pdf]

Supporting Material:

Jeffamine Derivatized TentaGel Beads and PDMS  
Microbead Cassettes for Ultra-high Throughput in  
situ Releasable Solution-Phase Cell-based Screening  
of OBOC Combinatorial Small Molecule Libraries

*Jared B. Townsend, Farzana Shaheen, Ruiwu Liu, and Kit S. Lam\**

Department of Biochemistry and Molecular Medicine, Division of Hematology & Oncology  
University of California Davis Cancer Center, University of California Davis, 4501 X Street,  
Sacramento, CA 95817

Kit.lam@ucdmc.ucdavis.edu

**RECEIVED DATE**

High-throughput Releasable Screening of OBOC Libraries.

Kit S. Lam M.D., Ph.D. Professor and Chair Department of Biochemistry and Molecular  
Medicine Professor of Medicine Division of Hematology & Oncology University of California  
Davis Cancer Center Sacramento, CA 95817. Tel: (916) 734-0910. [kit.lam@ucdmc.ucdavis.edu](mailto:kit.lam@ucdmc.ucdavis.edu)

## Supporting Information

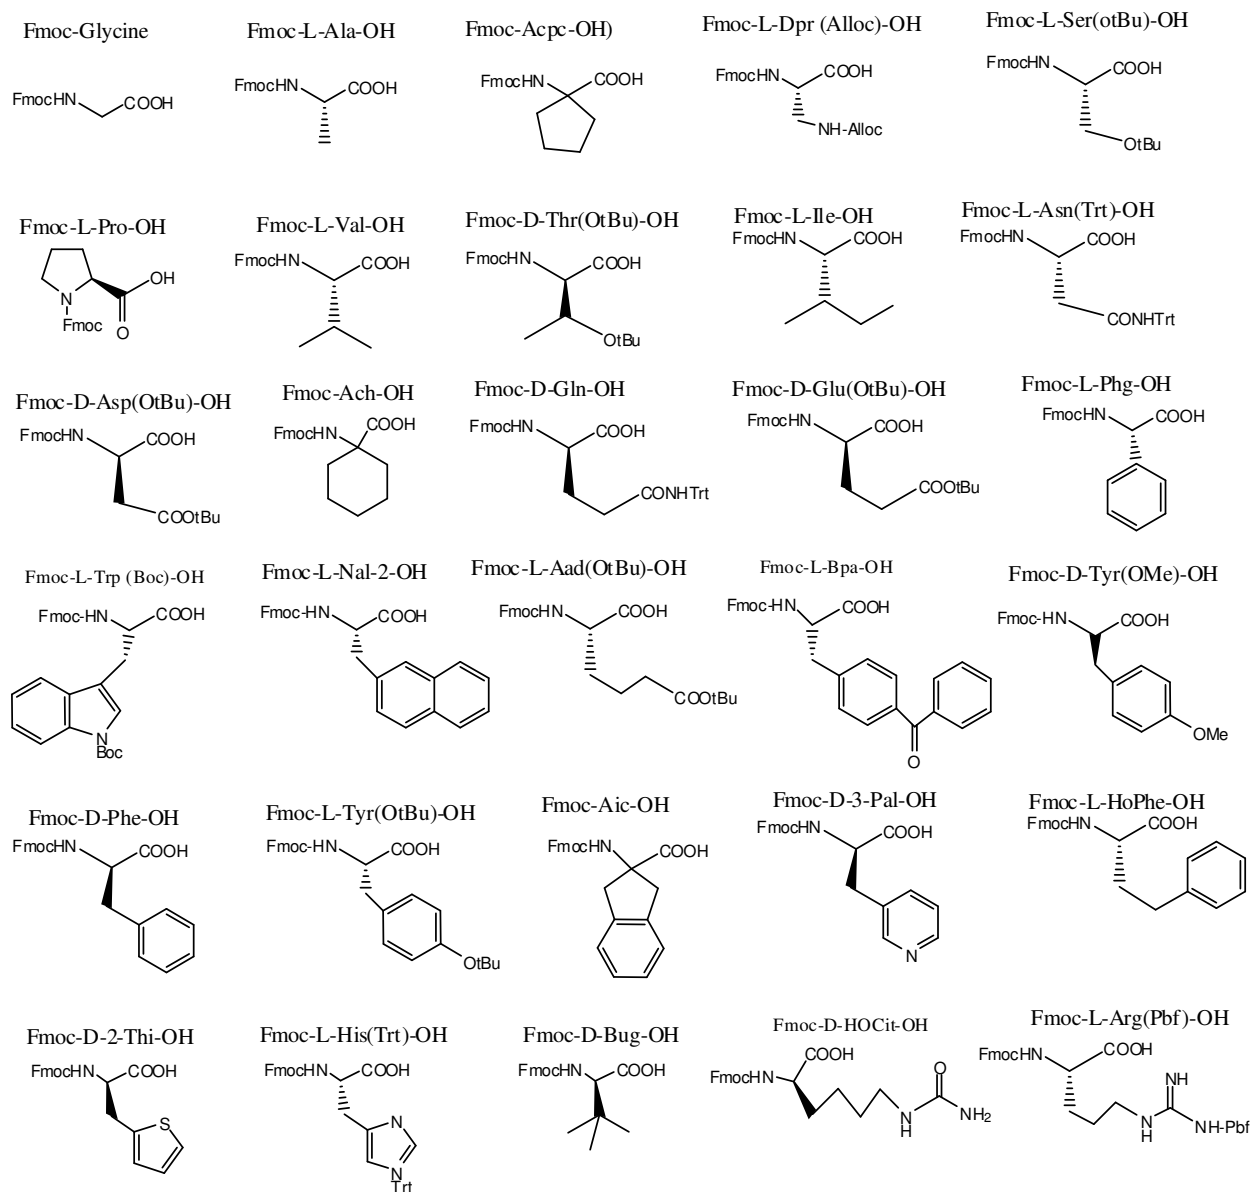

Fig. S1. Thirty Fmoc-amino acids used as building blocks for encoded small molecule library

Naphthyl carboxylic acid

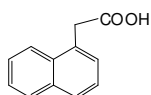

4-Bromo phenyl acetic acid

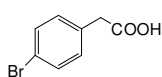

3-Pyridine propionic acid

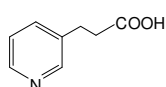

3-(Dimethylamino) benzoic acid

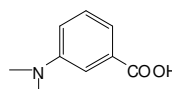

4-Chloro phenyl acetic acid

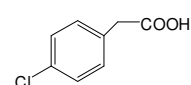

(1-Naphthoxy) acetic acid

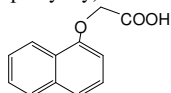

4-Hydroxy Phenyl acetic acid

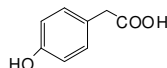

2-Pyrazine carboxylic acid

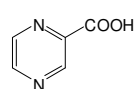

Phenoxy acetic acid

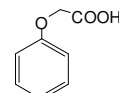

Glutaric anhydride

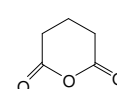

3,5-Dihydroxy benzoic acid

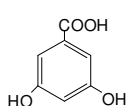

3-Hydroxy-2- quinoxaline carboxylic acid

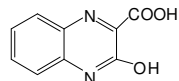

3,5-Dihydroxy-4-bromo benzoic acid

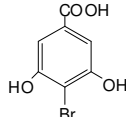

3,5-Difluoro benzoic acid

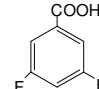

Phenyl propionic acid

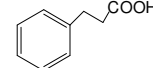

Indole 2-carboxylic acid

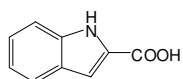

4-Biphenyl carboxylic acid

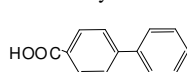

2-Phenoxy butyric acid

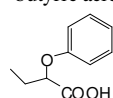

2-Phenyl-4-quinoline carboxylic acid

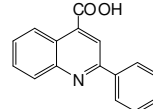

Trans-4-Cotinine carboxylic acid

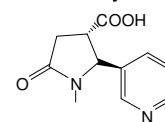

2-Thiophene carboxylic acid

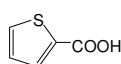

2-Naphthoxy acetic acid

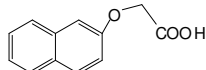

(S)-(+)-Oxo-4-phenyl-3-oxazolidine acetic acid

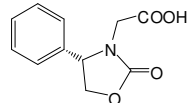

4-(Dimethyl amino) phenyl acetic acid

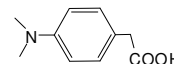

4-Phenoxy benzoic acid

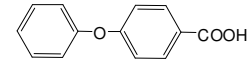

Fig S2. Chemical structure of 25 acylating reagents

F-7

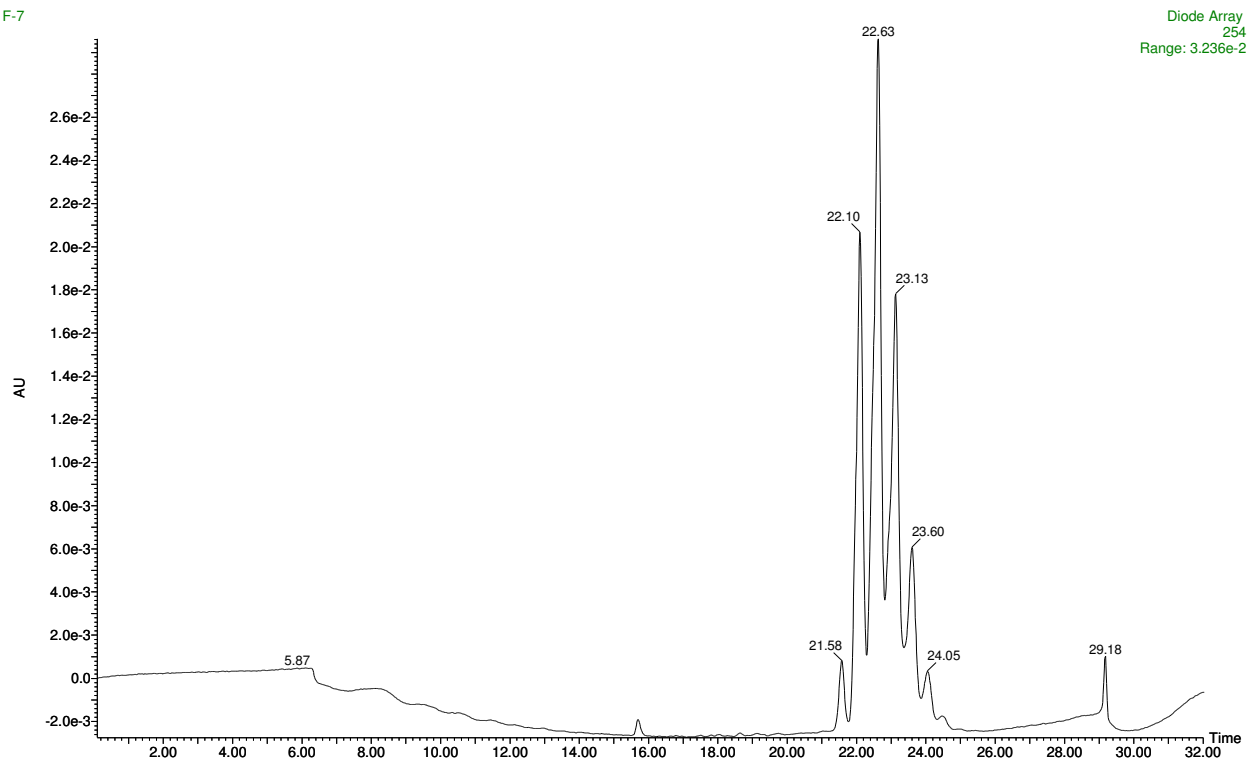

Figure S3. HPLC Chromatogram of Fmoc-Jeffamine Linker [(Fmoc)<sub>2</sub>-JA-OH]

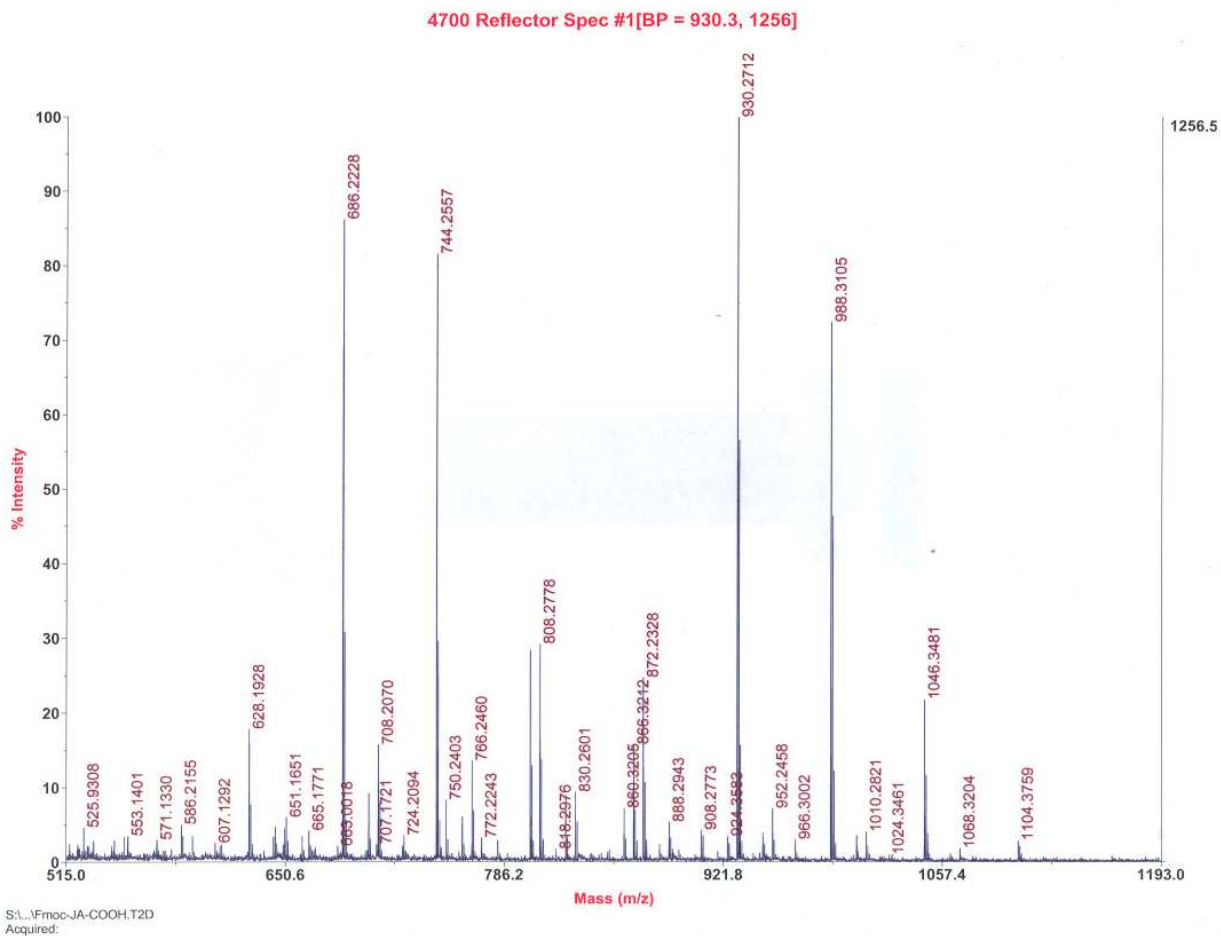

Figure S4. MALDI-TOF-MS spectra of Jeffamine Linker (Fmoc)<sub>2</sub>-JA-OH
